# Supplementary material for: Development of micropillar array electrodes for highly sensitive detection of biomarkers
Source: Royal Society of Chemistry journal article supplement (doi:10.1039/d0ra07694e), 2020-01-01
Supplement: d0ra07694e1.pdf [file d0ra07694e1.pdf]

1

## Electronic Supporting Information (ESI)

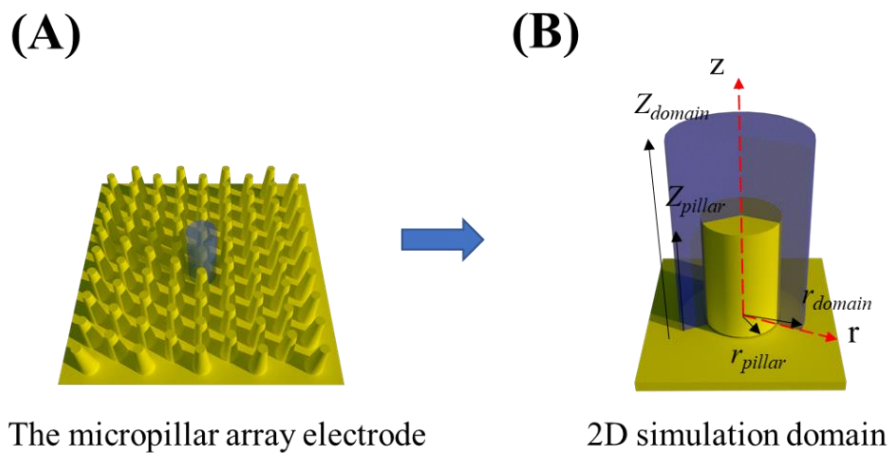

2

3 **Figure S1. (A) The schematic representation of the  $\mu$ AE. The blue cylinder represents the**  
4 **diffusion domain created for the simulation model. (B) The model with one pillar and a**  
5 **cylindrical diffusion domain for the numerical simulation.**

6

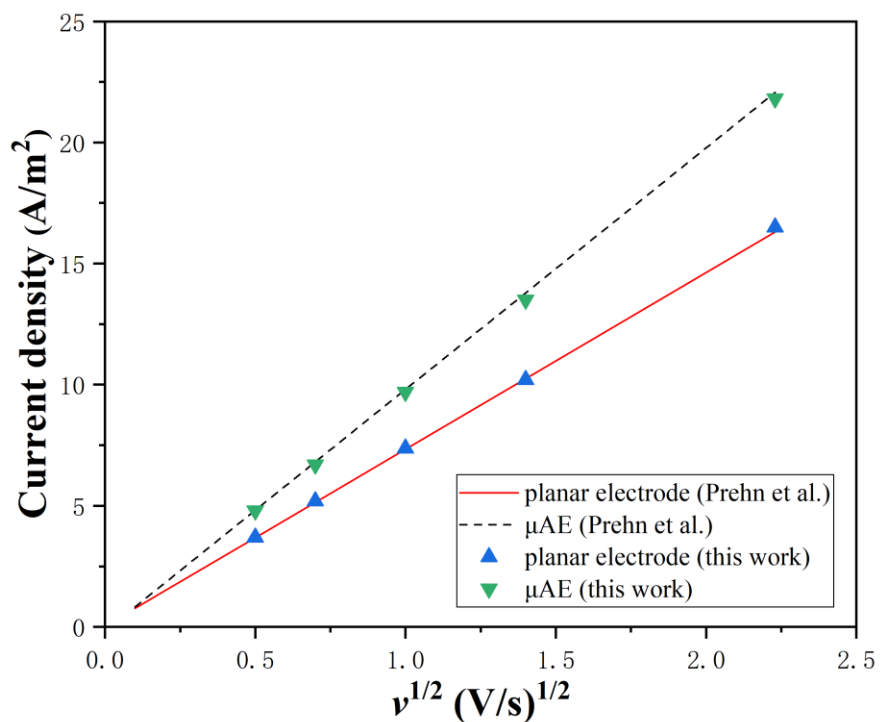

7  
 8 **Figure S2. The current density from the simulation of electrodes with the same geometry**  
 9 **and boundary conditions as those in the previous literature. The height, radius, and**  
 10 **separation of the μAE were 10 μm, 10 μm and 100 μm, respectively.**

11

12

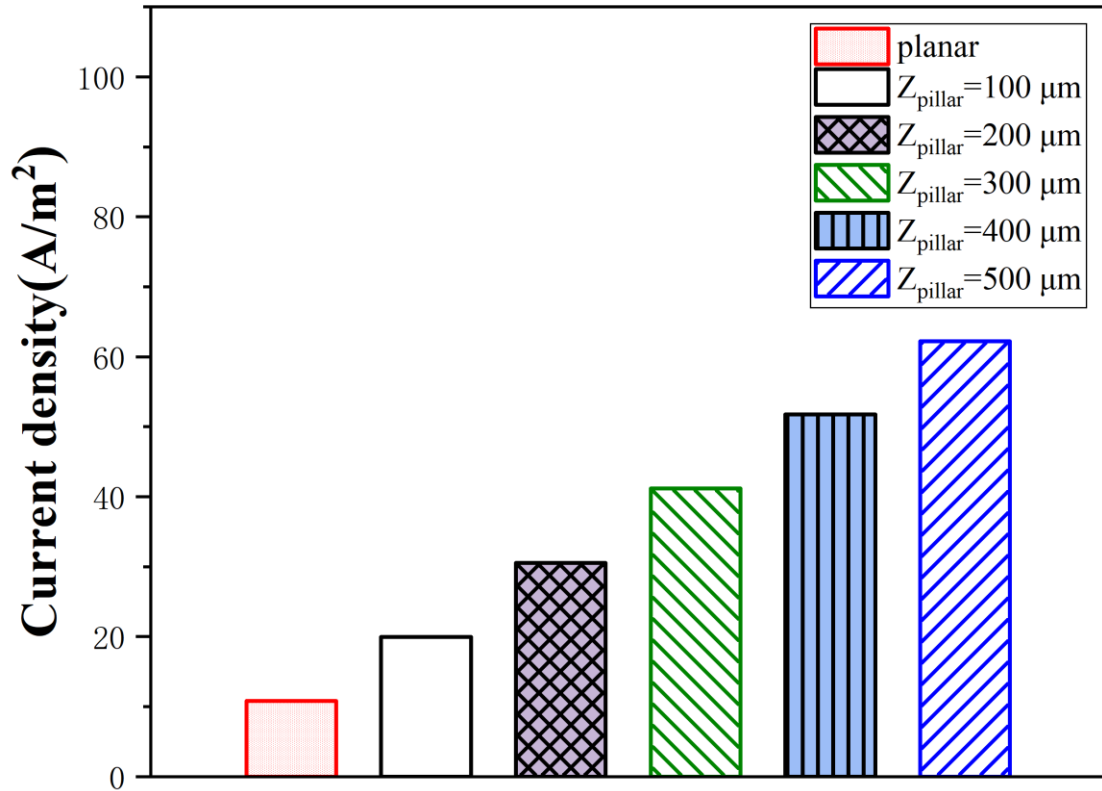

13

14 **Figure S3. The current density on the planar electrode and  $\mu$ AEs with distinct pillar**

15 **heights.  $Z_{pillar}$  is the pillar height.**

16

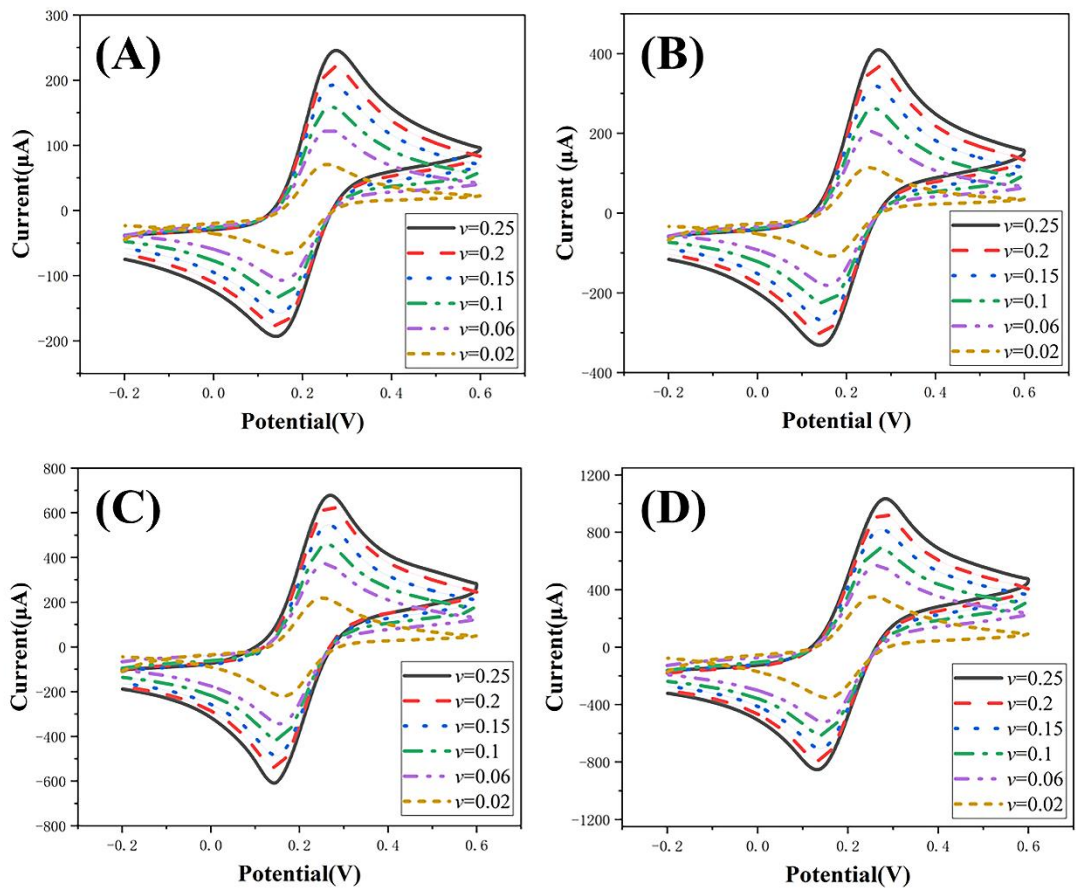

17

18 **Figure S4. Cyclic voltammetry of the planar (A),  $\mu\text{AE}100$  (B),  $\mu\text{AE}300$  (C), and  $\mu\text{AE}500$**

19 **(D) in the  $\text{K}_3[\text{Fe}(\text{CN})_6]/\text{K}_4[\text{Fe}(\text{CN})_6]$  solution with different scan rate  $\nu$ .**

20

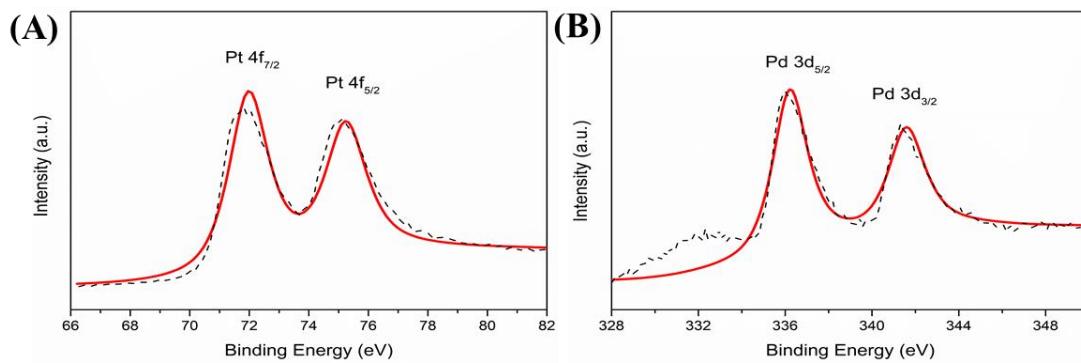

21

22 **Figure S5. The XPS spectra of (A) Pt and (B) Pd in the Pt-Pd/MWCNTs nanocomposites.**

23

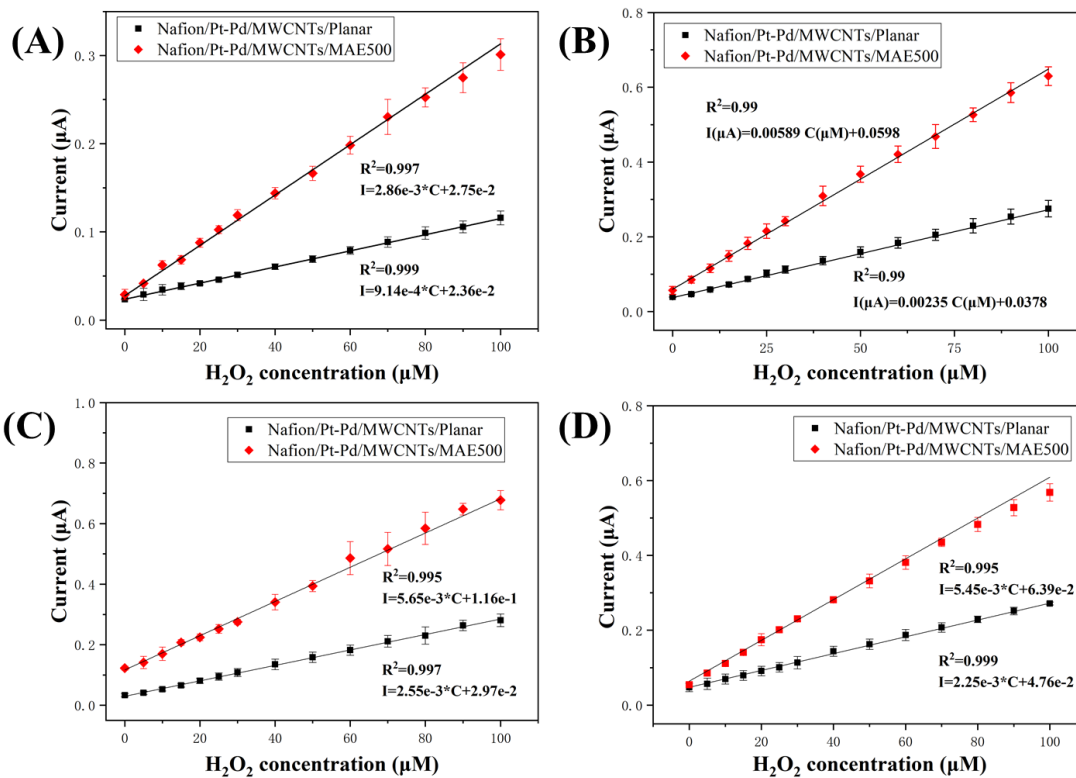

24

25 **Figure S6. The calibration curve of the  $\mu$ AE500 and the planar electrodes, when (A) 1  $\mu$ g,**  
 26 **(B) 2  $\mu$ g, (C) 4  $\mu$ g, and (D) 8  $\mu$ g Pt-Pd/MWCNTs were deposited on to both types of**  
 27 **electrodes.**

28

29 **Table S1 Boundary conditions used in the simulations.**

| Equations                                                                                | Boundary                                                                                                            |
|------------------------------------------------------------------------------------------|---------------------------------------------------------------------------------------------------------------------|
| $[A] = [A]_{bulk}$                                                                       | $0 \leq r \leq r_{domain}, z = z_{domain}$                                                                          |
| $[B] = 0$                                                                                | $0 \leq r \leq r_{domain}, z = z_{domain}$                                                                          |
| $\frac{\partial A}{\partial r} = \frac{\partial B}{\partial r} = 0$                      | $r = 0, z_{pillar} < z < z_{domain}$<br>$r = r_{domain}, 0 < z < z_{domain}$                                        |
| $D_A \frac{\partial A}{\partial r} = -D_B \frac{\partial B}{\partial r} = k_f A - k_b B$ | $r \leq r_{pillar}, z = z_{pillar}$<br>$r = r_{pillar}, 0 < z < z_{pillar}$<br>$r_{pillar} < r < r_{domain}, z = 0$ |

30

31

32 **Table S2 Parameters of the micropillar working electrode**

|                                               | planar | $\mu$ AE100 | $\mu$ AE300 | $\mu$ AE500 |
|-----------------------------------------------|--------|-------------|-------------|-------------|
| Projection area (mm*mm)                       | 3 × 3  |             |             |             |
| The top radius of the top surfaces ( $\mu$ m) | -      | 50          |             |             |
| Base radius of the base surfaces ( $\mu$ m)   | -      | 100         |             |             |
| Height ( $\mu$ m)                             | -      | 100         | 300         | 500         |
| Pitch ( $\mu$ m) <sup>a</sup>                 | -      | 300         |             |             |
| Number of pillars                             | -      | 90          |             |             |
| Surface area (cm <sup>2</sup> )               | 0.09   | 0.1161      | 0.1971      | 0.2817      |
| Normalised area <sup>b</sup>                  | 1.0    | 1.29        | 2.19        | 3.13        |

33 <sup>a</sup>Distance from pillar to pillar centers.

34 <sup>b</sup>Normalised by the area of the planar electrode.

35



36 **Table S3 Comparison of the electrochemical biosensors and their performances in**  
 37 **sarcosine detection.**

| Electrode                 | Modification                                                                                    | Electrode type | Linear range ( $\mu\text{M}$ ) | Sensitivity ( $\mu\text{A}\cdot\text{mM}^{-1}\cdot\text{cm}^{-2}$ ) | Detection limit ( $\mu\text{M}$ ) | References |
|---------------------------|-------------------------------------------------------------------------------------------------|----------------|--------------------------------|---------------------------------------------------------------------|-----------------------------------|------------|
| Glassy carbon electrode   | Sarcosine oxidase/<br>platinum -<br>mesoporous nickel<br>phosphonate                            | planar         | 5-40                           | 123.51                                                              | 0.24                              | [1]        |
| Glassy carbon electrode   | Riboflavin/ gold-<br>platinum bimetallic<br>nanoparticles-<br>polypyrrole/graphen<br>e-chitosan | planar         | 2.5-30                         | N/A                                                                 | 0.68                              | [2]        |
| Glassy carbon electrode   | Sarcosine<br>oxidase/platinum@<br>porous zeolitic<br>imidazolate<br>framework-8                 | planar         | 5-30                           | 14.3                                                                | 1.06                              | [3]        |
| Screen printed electrodes | Sarcosine oxidase                                                                               | planar         | 0.01-0.1                       | N/A                                                                 | 0.016                             | [4]        |
| graphite rod electrode    | Polyvinylalcohol-<br>partially<br>prehydrolyzed<br>tetraethyl<br>orthosilicate                  | planar         | 500-7500                       | 40.1                                                                | 500                               | [5]        |
| $\mu\text{AE}$            | Nafion/Pt-<br>Pd/MWCNTs                                                                         | $\mu\text{AE}$ | 5-60                           | 17.1                                                                | 1.28                              | This work  |

38

39

40

41

42 **Reference**

- 43 1. Wang, Q., et al., *Platinum-loaded mesoporous nickel phosphonate and its electrochemical application for*  
44 *sarcosine detection*. *Analytica Chimica Acta*, 2019. **1046**: p. 93-98.
- 45 2. Liu, T., et al., *An electrochemical sarcosine sensor based on biomimetic recognition*. *Mikrochim Acta*, 2019.  
46 **186**(3): p. 136.
- 47 3. Yang, H., et al., *Nano Pt@ ZIF8 modified electrode and its application to detect sarcosine*. *Journal of The*  
48 *Electrochemical Society*, 2018. **165**(5): p. H247-H250.
- 49 4. Rebelo, T.S., et al., *Sarcosine oxidase composite screen-printed electrode for sarcosine determination in*  
50 *biological samples*. *Analytica Chimica Acta*, 2014. **850**: p. 26-32.
- 51 5. Lad, U., et al., *Sarcosine oxidase encapsulated polyvinyl alcohol-silica-AuNP hybrid films for sarcosine*  
52 *sensing electrochemical bioelectrode*. *Journal of The Electrochemical Society*, 2014. **161**(5): p. B98-B101.

53
